# Supplementary material for: Alteration of the Early Development Environment by Maternal Diet and the Occurrence of Autistic-like Phenotypes in Rat Offspring
Source: MDPI journal article supplement (doi:10.3390/ijms22189662), 2021-09-07
Supplement: s1 [file s1]

**Table S1.** TaqMan Gene Expression Array gene list.

| Gene Symbol     | Gene Name                                                        | Reference Life Technologies |
|-----------------|------------------------------------------------------------------|-----------------------------|
| <i>Ankrd11</i>  | Ankyrin Repeat Domain 11                                         | Rn01431699_m1               |
| <i>Bcl11a</i>   | B-Cell CLL/Lymphoma 11A (Zinc Finger Protein)                    | Rn01225236_m1               |
| <i>Cacna1d</i>  | Calcium Channel, Voltage-Dependent, L Type, Alpha 1D Subunit     | Rn01453395_m1               |
| <i>Cacna2d3</i> | Calcium Channel, Voltage-Dependent, Alpha2/Delta Subunit 3       | Rn00598241_m1               |
| <i>En2</i>      | Engrailed Homeobox 2                                             | Rn01410380_m1               |
| <i>Fmr1</i>     | Fragile X Mental Retardation 1                                   | Rn00709627_m1               |
| <i>Foxp2</i>    | Forkhead Box P2                                                  | Rn01456150_m1               |
| <i>Gabrb3</i>   | Gamma-Aminobutyric Acid (GABA) A Receptor, Beta 3                | Rn00567029_m1               |
| <i>Hprt1</i>    | Hypoxanthine Phosphoribosyltransferase 1                         | Rn01527840_m1               |
| <i>Htr2a</i>    | 5-Hydroxytryptamine (Serotonin) Receptor 2A                      | Rn00568473_m1               |
| <i>Itgb3</i>    | Integrin, Beta 3                                                 | Rn00596601_m1               |
| <i>Mecp2</i>    | Methyl Cpg Binding Protein 2                                     | Rn01529606_g1               |
| <i>Nlgn3</i>    | Neuroligin 3                                                     | Rn01419002_m1               |
| <i>Oxtr</i>     | Oxytocin Receptor                                                | Rn00563503_m1               |
| <i>Pten</i>     | Phosphatase and Tensin Homolog                                   | Rn00477208_m1               |
| <i>Reln</i>     | Reelin                                                           | Rn00589609_m1               |
| <i>Shank1</i>   | SH3 and Multiple Ankyrin Repeat Domains 1                        | Rn00582088_m1               |
| <i>Shank2</i>   | SH3 and Multiple Ankyrin Repeat Domains 2                        | Rn01479040_m1               |
| <i>Shank3</i>   | SH3 and Multiple Ankyrin Repeat Domains 3                        | Rn00572344_m1               |
| <i>Slc6a4</i>   | Solute Carrier Family 6 (Neurotransmitter Transporter), Member 4 | Rn00564737_m1               |
| <i>Syn1</i>     | Synapsin I                                                       | Rn00569468_m1               |
| <i>Wnt2</i>     | Wingless-Type MMTV Integration Site Family Member 2              | Rn01500736_m1               |
| <i>Taok2</i>    | TAO Kinase 2                                                     | Rn00666184_m1               |
| 18S             | Eukaryotic 18S rRNA                                              | Hs99999901_s1               |

**Table S2.** The exact localization of the tested CG nucleotides during pyrosequencing experiments.

| Region        | Position | Chromosomal localization (RGSC 6.0/rn6) |            |
|---------------|----------|-----------------------------------------|------------|
| <b>Nlgn3</b>  | Pos.1    | chrX:71,199,517-71,199,518              | Exon 1     |
|               | Pos.2    | chrX:71,199,531-71,199,532              |            |
|               | Pos.3    | chrX:71,199,538-71,199,539              |            |
|               | Pos.4    | chrX:71,199,544-71,199,545              |            |
|               | Pos.5    | chrX:71,199,564-71,199,565              |            |
|               | Pos.6    | chrX:71,199,578-71,199,579              |            |
|               | Pos.7    | chrX:71,199,585-71,199,586              |            |
|               | Pos.8    | chrX:71,199,594-71,199,595              |            |
| <b>Taok2</b>  | Pos.1    | chr1:198,320,947-198,320,948            | CpG island |
|               | Pos.2    | chr1:198,320,953-198,320,954            |            |
|               | Pos.3    | chr1:198,320,957-198,320,958            |            |
|               | Pos.4    | chr1:198,320,962-198,320,963            |            |
|               | Pos.5    | chr1:198,320,968-198,320,969            |            |
|               | Pos.6    | chr1:198,320,970-198,320,971            |            |
|               | Pos.7    | chr1:198,320,975-198,320,976            |            |
|               | Pos.8    | chr1:198,321,002-198,321,003            |            |
|               | Pos.9    | chr1:198,321,013-198,321,014            |            |
| <b>Setd1b</b> | Pos.1    | chr1:199,224,075-199,224,076            | CpG island |
|               | Pos.2    | chr1:199,224,085-199,224,086            |            |
|               | Pos.3    | chr1:199,224,098-199,224,099            |            |
|               | Pos.4    | chr1:199,224,101-199,224,102            |            |
|               | Pos.5    | chr1:199,224,110-199,224,111            |            |
|               | Pos.6    | chr1:199,224,130-199,224,131            |            |
|               | Pos.7    | chr1:199,224,149-199,224,150            |            |
|               | Pos.8    | chr1:199,224,164-199,224,165            |            |
|               | Pos.9    | chr1:199,224,171-199,224,172            |            |

**Table S3.** Detailed information about primers sequences, genomic localization (RGSC 6.0/rn6), amplicon sizes and annealing temperatures during pyrosequencing experiments.

| Region | Localization (RGSC 6.0/rn6)  | Primer | Primer Sequence 5'-3'             | Annealing Temperature | Product Size |
|--------|------------------------------|--------|-----------------------------------|-----------------------|--------------|
| Nlgn3  | chrX:71,199,393-71,199,624   | F      | GGGTTATGTTTTAGGATTTGAGTTA         | 55 °C                 | 232bp        |
|        |                              | R      | biotin-ACCTCACCTATTCCTAAAC        |                       |              |
|        |                              | S      | GGTATAGTAGTTAGGTTG                | Sequencig primer      |              |
| Taok2  | chr1:198,320,924-198,321,070 | F      | AGGATTGTTGGAGAGAGTTGTA            | 61 °C                 | 147bp        |
|        |                              | R      | biotin-TACTCCTTTCAACCTTTACCTTACA  |                       |              |
|        |                              | S      | TGTTGGAGAGAGTTGTA                 | Sequencig primer      |              |
| Setd1b | chr1:199,224,035-199,224,203 | F      | GGTTTTTGTAGTTGTTTTATTAAGAA        | 55 °C                 | 169bp        |
|        |                              | R      | biotin-CCCAAATACCTATAAACTACAATACA |                       |              |
|        |                              | S      | GTTTTATTAAGAAAAATTTAGGAATAG       | Sequencig primer      |              |

F – Forward primer; R – Reverse primer

| Pyrosequencing PCR | Step                    | Temp [°C] | Time   |           |
|--------------------|-------------------------|-----------|--------|-----------|
|                    | Initial heat activation | 95        | 15 min |           |
|                    | Denaturation            | 94        | 30 s   | 45 cycles |
|                    | Annealing               | 55-61*    | 30 s   |           |
|                    | Extension               | 72        | 30 s   |           |
|                    | Final extension         | 72        | 10 min |           |

\* Annealing temperature depends on the using primers
